# Supplementary material for: Developing a profile of activities of daily living for bipolar disorder: a systematic review protocol and meta-analysis
Source: HighWire-hosted journal article supplement (doi:10.1136/bmjopen-2021-058783), 2022-05-01
Supplement: bmjopen-2021-058783supp001_data_supplement.pdf [file bmjopen-2021-058783supp001_data_supplement.pdf]

## Appendix A

**Table 1.** Search strategies for each database.

| Database | Search Strategy                                                                                                                                                                                                                                                                                                                                                                                                                                                                                                                                                     |
|----------|---------------------------------------------------------------------------------------------------------------------------------------------------------------------------------------------------------------------------------------------------------------------------------------------------------------------------------------------------------------------------------------------------------------------------------------------------------------------------------------------------------------------------------------------------------------------|
| Ovid     | 1. exp Activities of Daily Living/                                                                                                                                                                                                                                                                                                                                                                                                                                                                                                                                  |
| MEDLINE  | 2. exp Self Care/<br>3. exp Leisure Activities/<br>4. (“daily life” or “daily living” or instrument* or extended or leisure) adj3<br>activit*).tw,kf<br>5. (ADL* or BADL* or IADL* or EADL*).tw,kf<br>6. exp Functional Status/<br>7. (function* adj3 (capacity or independen* or status or assess* or abilit*).tw,kf<br>8. exp Bipolar Disorder/<br>9. exp Cyclothymic Disorder/<br>10. (bipolar adj3 (symptom* or diagnos* or disorder*).tw,kf<br>11. manic adj2 depress*.tw,kf<br>12. 1 or 2 or 3 or 4 or 5 or 6 or 7<br>13. 8 or 9 or 10 or 11<br>14. 12 and 13 |
| Embase   | 1. exp Activities of Daily Living/<br>2. exp ADL disability/<br>3. exp Daily life activity/<br>4. exp Leisure/<br>5. (“daily life” or “daily living” or instrument* or leisure or extended) adj3<br>activit*).tw,kw<br>6. (ADL* or BADL* or IADL* or EADL*).tw,kw<br>7. exp Functional Status/<br>8. exp Functional Assessment/<br>9. (function* adj3 (capacity or independen* or status or assess* or<br>abilit*).tw,kw                                                                                                                                            |

- 
10. exp Bipolar Disorder/
  11. exp Cyclothymic Disorder/
  12. (bipolar adj3 (symptom\* or diagnos\* or disorder\*)).tw,kw
  13. manic adj2 depress\*.tw,kw
  14. 1 or 2 or 3 or 4 or 5 or 6 or 7 or 8 or 9
  15. 10 or 11 or 12 or 13
  16. 14 and 15
- 

- |          |                                                                                                      |
|----------|------------------------------------------------------------------------------------------------------|
| APA      | 1. exp Activities of Daily Living/                                                                   |
| PsycINFO | 2. exp Self-Care/                                                                                    |
|          | 3. exp Leisure Time/                                                                                 |
|          | 4. (“daily life” or “daily living” or instrument* or extended or leisure) adj3<br>activit*).ti,ab,id |
|          | 5. (ADL* or BADL* or IADL* or EADL*).ti,ab,id                                                        |
|          | 6. exp Functional Status/                                                                            |
|          | 7. (function* adj3 (capacity or independen* or status or assess* or<br>abilit*).ti,ab,id             |
|          | 8. (bipolar adj3 (symptom* or diagnos* or disorder*)).ti,ab,id                                       |
|          | 9. exp Bipolar Disorder/                                                                             |
|          | 10. exp Cyclothymic Disorder/                                                                        |
|          | 11. manic adj2 depress*.ti,ab,id                                                                     |
|          | 12. 1 or 2 or 3 or 4 or 5 or 6                                                                       |
|          | 13. 7 or 8 or 9                                                                                      |
|          | 14. 12 and 13                                                                                        |
- 

- |        |                                                                                                                                                                                           |
|--------|-------------------------------------------------------------------------------------------------------------------------------------------------------------------------------------------|
| CINAHL | 1. MH “Activities of Daily Living”                                                                                                                                                        |
|        | 2. MH “Self Care”                                                                                                                                                                         |
|        | 3. MH “Leisure Activities”                                                                                                                                                                |
|        | 4. TI (“daily life” or “daily living” or instrument* or extended or leisure) N2<br>activit*) or AB (“daily life” or “daily living” or instrument* or extended or<br>leisure) N2 activit*) |
-

- 
5. TI (self N2 care) OR AB (self N2 care)
  6. TI (BADL\* or IADL\* or EADL\*) OR AB (BADL\* or IADL\* or EADL\*)
  7. MH “Functional Status”
  8. MH “Functional Assessment”
  9. TI (function\* N2 (capacity or independen\* or status or assess\* or abilit\*)) OR AB (function\* N2 (capacity or independen\* or status or assess\* or abilit\*))
  10. MH “Bipolar Disorder” or MH “Cyclothymic Disorder”
  11. TI (bipolar N2 (symptom\* or diagnos\* or disorder\*)) OR AB (bipolar N2 (symptom\* or diagnos\* or disorder\*))
  12. TI (manic N2 depress\*) OR AB (manic N2 depress\*)
  13. 1 or 2 or 3 or 4 or 5 or 6 or 7 or 8 or 9
  14. 10 or 11 or 12
  15. 13 or 14
-
